# Supplementary material
Source: PubMed Central journal article supplement (PMC8526414)
Supplement: NIHMS1735416-supplement-5.pdf [file NIHMS1735416-supplement-5.pdf]

**Table S1.** Top 100 proteins identified in the isolated EVs compared to Vesiclepedia database*Top 100 EV proteins listed in the Vesiclepedia database were downloaded on 02/14/2021.*

| Vesiclepedia information |                 | Expression in                                                                                 |                                                                                                   |
|--------------------------|-----------------|-----------------------------------------------------------------------------------------------|---------------------------------------------------------------------------------------------------|
| No.                      | Gene Symbol     | Naïve D3-EV                                                                                   | Naïve RAW-EV                                                                                      |
| 1                        | <b>PDCD6IP</b>  | Not detected                                                                                  | Q80Y09_MOUSE Pcd6ip protein OS=Mus musculus OX=10090 GN=Pcd6ip PE=2 SV=1                          |
| 2                        | <b>GAPDH</b>    | G3P_HUMAN Glyceraldehyde-3-phosphate dehydrogenase OS=Homo sapiens OX=9606 GN=GAPDH PE=1 SV=3 | D2KHZ9_MOUSE Glyceraldehyde-3-phosphate dehydrogenase OS=Mus musculus OX=10090 GN=GAPDH PE=2 SV=1 |
| 3                        | <b>HSPA8</b>    | Not detected                                                                                  | Q3UBA6_MOUSE Uncharacterized protein OS=Mus musculus OX=10090 GN=Hspa8 PE=2 SV=1                  |
| 4                        | <b>ACTB</b>     | Not detected                                                                                  | B2RRX1_MOUSE Actin, beta OS=Mus musculus OX=10090 GN=Actb PE=2 SV=1                               |
| 5                        | <b>ANXA2</b>    | ANXA2_HUMAN Annexin A2 OS=Homo sapiens OX=9606 GN=ANXA2 PE=1 SV=2                             | Not detected                                                                                      |
| 6                        | <b>CD9</b>      | Not detected                                                                                  | CD9_MOUSE CD9 antigen OS=Mus musculus OX=10090 GN=Cd9 PE=1 SV=2                                   |
| 7                        | <b>PKM</b>      | KPYM_HUMAN Pyruvate kinase PKM OS=Homo sapiens OX=9606 GN=PKM PE=1 SV=4                       | KPYM_MOUSE Pyruvate kinase PKM OS=Mus musculus OX=10090 GN=Pkm PE=1 SV=4                          |
| 8                        | <b>HSP90AA1</b> | HS90A_HUMAN Isoform 2 of Heat shock protein HSP 90-alpha OS=Homo sapiens OX=9606 GN=HSP90AA1  | Not detected                                                                                      |
| 9                        | <b>ENO1</b>     | ENOA_HUMAN Alpha-enolase OS=Homo sapiens OX=9606 GN=ENO1 PE=1 SV=2                            | ENOA_MOUSE Alpha-enolase OS=Mus musculus OX=10090 GN=Eno1 PE=1 SV=3                               |
| 10                       | <b>ANXA5</b>    | Not detected                                                                                  | ANXA5_MOUSE Annexin A5 OS=Mus musculus OX=10090 GN=Anxa5 PE=1 SV=1                                |

| Vesiclepedia information |                 | Expression in                                                                           |                                                                                                                                                                         |
|--------------------------|-----------------|-----------------------------------------------------------------------------------------|-------------------------------------------------------------------------------------------------------------------------------------------------------------------------|
| No.                      | Gene Symbol     | Naïve D3-EV                                                                             | Naïve RAW-EV                                                                                                                                                            |
| 11                       | <b>HSP90AB1</b> | Not detected                                                                            | 1) ENPL_MOUSE Endoplasmin OS=Mus musculus OX=10090 GN=Hsp90b1 PE=1 SV=2<br>2) HS90B_MOUSE Heat shock protein HSP 90-beta OS=Mus musculus OX=10090 GN=Hsp90ab1 PE=1 SV=3 |
| 12                       | <b>CD63</b>     | Not detected                                                                            | Not detected                                                                                                                                                            |
| 13                       | <b>YWHAZ</b>    | 1433Z_HUMAN 14-3-3 protein zeta/delta OS=Homo sapiens OX=9606 GN=YWHAZ PE=1 SV=1        | Not detected                                                                                                                                                            |
| 14                       | <b>YWHAE</b>    | 1433E_HUMAN 14-3-3 protein epsilon OS=Homo sapiens OX=9606 GN=YWHAE PE=1 SV=1           | Not detected                                                                                                                                                            |
| 15                       | <b>EEF1A1</b>   | Not detected                                                                            | EF1A1_MOUSE Elongation factor 1-alpha 1 OS=Mus musculus OX=10090 GN=Eef1a1 PE=1 SV=3                                                                                    |
| 16                       | <b>PGK1</b>     | Not detected                                                                            | PGK1_MOUSE Phosphoglycerate kinase 1 OS=Mus musculus OX=10090 GN=Pgk1 PE=1 SV=4                                                                                         |
| 17                       | <b>CLTC</b>     | CLH1_HUMAN Clathrin heavy chain 1 OS=Homo sapiens OX=9606 GN=CLTC PE=1 SV=5             | Q5SXR6_MOUSE Clathrin heavy chain OS=Mus musculus OX=10090 GN=Cltc PE=1 SV=1                                                                                            |
| 18                       | <b>PPIA</b>     | Not detected                                                                            | PPIA_MOUSE Peptidyl-prolyl cis-trans isomerase A OS=Mus musculus OX=10090 GN=Ppia PE=1 SV=2                                                                             |
| 19                       | <b>SDCBP</b>    | Not detected                                                                            | Not detected                                                                                                                                                            |
| 20                       | <b>ALDOA</b>    | ALDOA_HUMAN Fructose-bisphosphate aldolase A OS=Homo sapiens OX=9606 GN=ALDOA PE=1 SV=2 | A6ZI44_MOUSE Fructose-bisphosphate aldolase OS=Mus musculus OX=10090 GN=Aldoa PE=1 SV=1                                                                                 |

| Vesiclepedia information |               | Expression in                                                                              |                                                                                                               |
|--------------------------|---------------|--------------------------------------------------------------------------------------------|---------------------------------------------------------------------------------------------------------------|
| No.                      | Gene Symbol   | Naïve D3-EV                                                                                | Naïve RAW-EV                                                                                                  |
| 21                       | <b>EEF2</b>   | Not detected                                                                               | EF2_MOUSE Elongation factor 2 OS=Mus musculus OX=10090 GN=Eef2 PE=1 SV=2                                      |
| 22                       | <b>ALB</b>    | ALBU_HUMAN Serum albumin OS=Homo sapiens OX=9606 GN=ALB PE=1 SV=2                          | ALBU_MOUSE Serum albumin OS=Mus musculus OX=10090 GN=Alb PE=1 SV=3                                            |
| 23                       | <b>TPI1</b>   | TPIS_HUMAN Isoform 2 of Triosephosphate isomerase OS=Homo sapiens OX=9606 GN=TPI1          | TPIS_MOUSE Triosephosphate isomerase OS=Mus musculus OX=10090 GN=Tpi1 PE=1 SV=4                               |
| 24                       | <b>VCP</b>    | Not detected                                                                               | TERA_MOUSE Transitional endoplasmic reticulum ATPase OS=Mus musculus OX=10090 GN=Vcp PE=1 SV=4                |
| 25                       | <b>CFL1</b>   | Not detected                                                                               | COF1_MOUSE Cofilin-1 OS=Mus musculus OX=10090 GN=Cfl1 PE=1 SV=3                                               |
| 26                       | <b>MSN</b>    | Not detected                                                                               | MOES_MOUSE Moesin OS=Mus musculus OX=10090 GN=Msn PE=1 SV=3                                                   |
| 27                       | <b>ATP1A1</b> | Not detected                                                                               | AT1A1_MOUSE Sodium/potassium-transporting ATPase subunit alpha-1 OS=Mus musculus OX=10090 GN=Atp1a1 PE=1 SV=1 |
| 28                       | <b>PRDX1</b>  | Not detected                                                                               | Not detected                                                                                                  |
| 29                       | <b>MYH9</b>   | MYH9_HUMAN Myosin-9 OS=Homo sapiens OX=9606 GN=MYH9 PE=1 SV=4                              | MYH9_MOUSE Myosin-9 OS=Mus musculus OX=10090 GN=Myh9 PE=1 SV=4                                                |
| 30                       | <b>EZR</b>    | Not detected                                                                               | Not detected                                                                                                  |
| 31                       | <b>CD81</b>   | Not detected                                                                               | Not detected                                                                                                  |
| 32                       | <b>ANXA6</b>  | Not detected                                                                               | Not detected                                                                                                  |
| 33                       | <b>FLOT1</b>  | Not detected                                                                               | Not detected                                                                                                  |
| 34                       | <b>YWHAB</b>  | Not detected                                                                               | Not detected                                                                                                  |
| 35                       | <b>LDHB</b>   | Not detected                                                                               | Not detected                                                                                                  |
| 36                       | <b>SLC3A2</b> | 4F2_HUMAN 4F2 cell-surface antigen heavy chain OS=Homo sapiens OX=9606 GN=SLC3A2 PE=1 SV=3 | 4F2_MOUSE 4F2 cell-surface antigen heavy chain OS=Mus musculus OX=10090 GN=Slc3a2 PE=1 SV=1                   |

| Vesiclepedia information |               | Expression in                                                                                      |                                                                                                                                                                         |
|--------------------------|---------------|----------------------------------------------------------------------------------------------------|-------------------------------------------------------------------------------------------------------------------------------------------------------------------------|
| No.                      | Gene Symbol   | Naïve D3-EV                                                                                        | Naïve RAW-EV                                                                                                                                                            |
| 37                       | <b>GNB1</b>   | Not detected                                                                                       |                                                                                                                                                                         |
| 38                       | <b>PFN1</b>   | Not detected                                                                                       | PROF1_MOUSE Profilin-1<br>OS=Mus musculus OX=10090<br>GN=Pfn1 PE=1 SV=2                                                                                                 |
| 39                       | <b>TSG101</b> | Not detected                                                                                       | Not detected                                                                                                                                                            |
| 40                       | <b>YWHAQ</b>  | 1433T_HUMAN 14-3-3<br>protein theta OS=Homo<br>sapiens OX=9606<br>GN=YWHAQ PE=1 SV=1               | Not detected                                                                                                                                                            |
| 41                       | <b>GNAI2</b>  | Not detected                                                                                       | Not detected                                                                                                                                                            |
| 42                       | <b>CLIC1</b>  | Not detected                                                                                       | Q542F1_MOUSE Chloride<br>intracellular channel protein<br>OS=Mus musculus OX=10090<br>GN=Clic1 PE=1 SV=1                                                                |
| 43                       | <b>ANXA1</b>  | ANXA1_HUMAN<br>Annexin A1 OS=Homo<br>sapiens OX=9606<br>GN=ANXA1 PE=1 SV=2                         | Not detected                                                                                                                                                            |
| 44                       | <b>ITGB1</b>  | Not detected                                                                                       | 1) ITB2_MOUSE Integrin beta-<br>2 OS=Mus musculus OX=10090<br>GN=Itgb2 PE=1 SV=2<br><br>2) ITB1_MOUSE Integrin beta-1<br>OS=Mus musculus OX=10090<br>GN=Itgb1 PE=1 SV=1 |
| 45                       | <b>LDHA</b>   | LDHA_HUMAN Isoform<br>3 of L-lactate dehydrogenase<br>A chain OS=Homo sapiens<br>OX=9606 GN=LDHA   | A0A1B0GSR9_MOUSE L-<br>lactate dehydrogenase OS=Mus<br>musculus OX=10090 GN=Ldha<br>PE=1 SV=1                                                                           |
| 46                       | <b>FASN</b>   | FAS_HUMAN Fatty acid<br>synthase OS=Homo sapiens<br>OX=9606 GN=FASN PE=1<br>SV=3                   | FAS_MOUSE Fatty acid<br>synthase OS=Mus musculus<br>OX=10090 GN=Fasn PE=1 SV=2                                                                                          |
| 47                       | <b>CDC42</b>  | Not detected                                                                                       | Not detected                                                                                                                                                            |
| 48                       | <b>RAP1B</b>  | Not detected                                                                                       | Not detected                                                                                                                                                            |
| 49                       | <b>CCT2</b>   | TCPB_HUMAN T-<br>complex protein 1 subunit<br>beta OS=Homo sapiens<br>OX=9606 GN=CCT2 PE=1<br>SV=4 | TCPB_MOUSE T-complex<br>protein 1 subunit beta OS=Mus<br>musculus OX=10090 GN=Cct2<br>PE=1 SV=4                                                                         |

| Vesiclepedia information |                 | Expression in                                                                                                                                                                                                                                                             |                                                                                    |
|--------------------------|-----------------|---------------------------------------------------------------------------------------------------------------------------------------------------------------------------------------------------------------------------------------------------------------------------|------------------------------------------------------------------------------------|
| No.                      | Gene Symbol     | Naïve D3-EV                                                                                                                                                                                                                                                               | Naïve RAW-EV                                                                       |
| 50                       | <b>YWHAG</b>    | 1433G_HUMAN 14-3-3 protein gamma OS=Homo sapiens OX=9606 GN=YWHAG PE=1 SV=2                                                                                                                                                                                               | Not detected                                                                       |
| 51                       | <b>GNB2</b>     | Not detected                                                                                                                                                                                                                                                              | Not detected                                                                       |
| 52                       | <b>ACTN4</b>    | ACTN4_HUMAN Alpha-actinin-4 OS=Homo sapiens OX=9606 GN=ACTN4 PE=1 SV=2                                                                                                                                                                                                    | Not detected                                                                       |
| 53                       | <b>RAB5C</b>    | Not detected                                                                                                                                                                                                                                                              | RAB5C_MOUSE Ras-related protein Rab-5C OS=Mus musculus OX=10090 GN=Rab5c PE=1 SV=2 |
| 54                       | <b>C3</b>       | Not detected                                                                                                                                                                                                                                                              | Not detected                                                                       |
| 55                       | <b>RAB10</b>    | Not detected                                                                                                                                                                                                                                                              | Not detected                                                                       |
| 56                       | <b>HIST1H4A</b> | H4_HUMAN Histone H4 OS=Homo sapiens OX=9606 GN=HIST1H4A PE=1 SV=2                                                                                                                                                                                                         | Not detected                                                                       |
| 57                       | <b>KRT1</b>     | 1) K2C1_HUMAN Keratin, type II cytoskeletal 1 OS=Homo sapiens OX=9606 GN=KRT1 PE=1 SV=6<br>2) K1C9_HUMAN Keratin, type I cytoskeletal 9 OS=Homo sapiens OX=9606 GN=KRT9 PE=1 SV=3<br>3) K1C10_HUMAN Keratin, type I cytoskeletal 10 OS=Homo sapiens OX=9606 GN=KRT10 PE=1 | E9Q1Z0_MOUSE Keratin 90 OS=Mus musculus OX=10090 GN=Krt90 PE=1 SV=1                |
| 58                       | <b>FN1</b>      | FINC_HUMAN Fibronectin OS=Homo sapiens OX=9606 GN=FN1 PE=1 SV=4                                                                                                                                                                                                           | Not detected                                                                       |
| 59                       | <b>AHCY</b>     | SAHH_HUMAN Adenosylhomocysteinase OS=Homo sapiens OX=9606 GN=AHCY PE=1 SV=4                                                                                                                                                                                               | Not detected                                                                       |
| 60                       | <b>A2M</b>      | Not detected                                                                                                                                                                                                                                                              | Not detected                                                                       |
| 61                       | <b>BSG</b>      | Not detected                                                                                                                                                                                                                                                              | Not detected                                                                       |

| Vesiclepedia information |                 | Expression in                                                                                 |                                                                                               |
|--------------------------|-----------------|-----------------------------------------------------------------------------------------------|-----------------------------------------------------------------------------------------------|
| No.                      | Gene Symbol     | Naïve D3-EV                                                                                   | Naïve RAW-EV                                                                                  |
| 62                       | <b>ACTN1</b>    | ACTN1_HUMAN<br>Isoform 3 of Alpha-actinin-1<br>OS=Homo sapiens OX=9606<br>GN=ACTN1            | Not detected                                                                                  |
| 63                       | <b>ANXA7</b>    | Not detected                                                                                  | Not detected                                                                                  |
| 64                       | <b>ACLY</b>     | ACLY_HUMAN ATP-citrate synthase<br>OS=Homo sapiens OX=9606<br>GN=ACLY PE=1 SV=3               | Not detected                                                                                  |
| 65                       | <b>HIST1H4B</b> | Not detected                                                                                  | Not detected                                                                                  |
| 66                       | <b>GDI2</b>     | Not detected                                                                                  | Q3TIY6_MOUSE Rab GDP dissociation inhibitor<br>OS=Mus musculus OX=10090<br>GN=Gdi2 PE=2 SV=1  |
| 67                       | <b>FLNA</b>     | FLNA_HUMAN Filamin-A<br>OS=Homo sapiens OX=9606<br>GN=FLNA PE=1 SV=4                          | Not detected                                                                                  |
| 68                       | <b>UBA1</b>     | Not detected                                                                                  | A0A1S6GWH5_MOUSE<br>Uncharacterized protein<br>OS=Mus musculus OX=10090<br>GN=Uba1 PE=2 SV=1  |
| 69                       | <b>GNAS</b>     | Not detected                                                                                  | Not detected                                                                                  |
| 70                       | <b>GSN</b>      | Not detected                                                                                  | Not detected                                                                                  |
| 71                       | <b>CCT4</b>     | TCPD_HUMAN T-complex protein 1 subunit delta<br>OS=Homo sapiens OX=9606<br>GN=CCT4 PE=1 SV=4  | TCPD_MOUSE T-complex protein 1 subunit delta<br>OS=Mus musculus OX=10090<br>GN=Cct4 PE=1 SV=3 |
| 72                       | <b>RAN</b>      | Not detected                                                                                  | Not detected                                                                                  |
| 73                       | <b>PRDX2</b>    | Not detected                                                                                  | Not detected                                                                                  |
| 74                       | <b>RHOA</b>     | Not detected                                                                                  | Not detected                                                                                  |
| 75                       | <b>CCT3</b>     | Not detected                                                                                  | TCPG_MOUSE T-complex protein 1 subunit gamma<br>OS=Mus musculus OX=10090<br>GN=Cct3 PE=1 SV=1 |
| 76                       | <b>RAC1</b>     | Not detected                                                                                  | Not detected                                                                                  |
| 77                       | <b>LGALS3BP</b> | LG3BP_HUMAN<br>Galectin-3-binding protein<br>OS=Homo sapiens OX=9606<br>GN=LGALS3BP PE=1 SV=1 | LG3BP_MOUSE Galectin-3-binding protein<br>OS=Mus musculus OX=10090<br>GN=Lgals3bp PE=1 SV=1   |

| Vesiclepedia information |                 | Expression in                                                                                                                                                              |                                                                                                                                                                              |
|--------------------------|-----------------|----------------------------------------------------------------------------------------------------------------------------------------------------------------------------|------------------------------------------------------------------------------------------------------------------------------------------------------------------------------|
| No.                      | Gene Symbol     | Naïve D3-EV                                                                                                                                                                | Naïve RAW-EV                                                                                                                                                                 |
| 78                       | <b>TCP1</b>     | Not detected                                                                                                                                                               | TCPA_MOUSE T-complex protein 1 subunit alpha OS=Mus musculus OX=10090 GN=Tcp1 PE=1 SV=3                                                                                      |
| 79                       | <b>KRT10</b>    | Not detected                                                                                                                                                               |                                                                                                                                                                              |
| 80                       | <b>CAP1</b>     | Not detected                                                                                                                                                               | CAP1_MOUSE Adenylyl cyclase-associated protein 1 OS=Mus musculus OX=10090 GN=Cap1 PE=1 SV=4                                                                                  |
| 81                       | <b>RAB7A</b>    | Not detected                                                                                                                                                               | Not detected                                                                                                                                                                 |
| 82                       | <b>TUBB4B</b>   | 1) TBB5_HUMAN Tubulin beta chain OS=Homo sapiens OX=9606 GN=TUBB PE=1 SV=2<br>2) TBB4B_HUMAN Tubulin beta-4B chain OS=Homo sapiens OX=9606 GN=TUBB4B PE=1 SV=1             | Not detected                                                                                                                                                                 |
| 83                       | <b>HSPA5</b>    | Not detected                                                                                                                                                               | BIP_MOUSE Endoplasmic reticulum chaperone BiP OS=Mus musculus OX=10090 GN=Hspa5 PE=1 SV=3                                                                                    |
| 84                       | <b>IQGAP1</b>   | Not detected                                                                                                                                                               | Not detected                                                                                                                                                                 |
| 85                       | <b>GPI</b>      | Not detected                                                                                                                                                               | Not detected                                                                                                                                                                 |
| 86                       | <b>RALA</b>     | Not detected                                                                                                                                                               | Not detected                                                                                                                                                                 |
| 87                       | <b>KPNB1</b>    | IMB1_HUMAN Importin subunit beta-1 OS=Homo sapiens OX=9606 GN=KPNB1 PE=1 SV=2                                                                                              | Not detected                                                                                                                                                                 |
| 88                       | <b>HIST1H4I</b> | Not detected                                                                                                                                                               | Not detected                                                                                                                                                                 |
| 89                       | <b>TFRC</b>     | Not detected                                                                                                                                                               | Not detected                                                                                                                                                                 |
| 90                       | <b>EIF4A1</b>   | 1) EIF3L_HUMAN Eukaryotic translation initiation factor 3 subunit L OS=Homo sapiens OX=9606 GN=EIF3L PE=1 SV=1<br>2) DDX17_HUMAN Probable ATP-dependent RNA helicase DDX17 | 1) B7ZWF1_MOUSE Ddx3x protein OS=Mus musculus OX=10090 GN=Ddx3x PE=2 SV=1<br>2) IF4A3_MOUSE Eukaryotic initiation factor 4A-III OS=Mus musculus OX=10090 GN=Eif4a3 PE=1 SV=3 |

| Vesiclepedia information |                 | Expression in                                                                          |                                                                                                                  |
|--------------------------|-----------------|----------------------------------------------------------------------------------------|------------------------------------------------------------------------------------------------------------------|
| No.                      | Gene Symbol     | Naïve D3-EV                                                                            | Naïve RAW-EV                                                                                                     |
|                          |                 | OS=Homo sapiens OX=9606<br>GN=DDX17 PE=1 SV=2                                          | 3) Q8VH52_MOUSE Translation initiation factor-3 subunit 5 (Fragment) OS=Mus musculus OX=10090 GN=Eif3f PE=2 SV=1 |
| 91                       | <b>HIST4H4</b>  | Not detected                                                                           | Not detected                                                                                                     |
| 92                       | <b>CCT8</b>     | TCPQ_HUMAN T-complex protein 1 subunit theta OS=Homo sapiens OX=9606 GN=CCT8 PE=1 SV=4 | Q8BVY8_MOUSE Uncharacterized protein OS=Mus musculus OX=10090 GN=Cct8 PE=2 SV=1                                  |
| 93                       | <b>TLN1</b>     | Not detected                                                                           | Q80TM2_MOUSE MKIAA1027 protein (Fragment) OS=Mus musculus OX=10090 GN=Tln1 PE=2 SV=4                             |
| 94                       | <b>HIST1H4K</b> | Not detected                                                                           | Not detected                                                                                                     |
| 95                       | <b>HIST1H4H</b> | Not detected                                                                           | Not detected                                                                                                     |
| 96                       | <b>CCT6A</b>    | TCPZ_HUMAN T-complex protein 1 subunit zeta OS=Homo sapiens OX=9606 GN=CCT6A PE=1 SV=3 | Not detected                                                                                                     |
| 97                       | <b>ANXA11</b>   | Not detected                                                                           | Not detected                                                                                                     |
| 98                       | <b>HIST1H4J</b> | Not detected                                                                           | Not detected                                                                                                     |
| 99                       | <b>HIST1H4F</b> | Not detected                                                                           | Not detected                                                                                                     |
| 100                      | <b>HIST1H4D</b> | Not detected                                                                           | Not detected                                                                                                     |



**Table S2.** Gene IDs for D3-EVs versus RAW-EVs

| <b>Gene ID</b>     |                     |
|--------------------|---------------------|
| <b>Naïve D3-EV</b> | <b>Naïve RAW-EV</b> |
| GAPDH              | PDCD6IP             |
| ANXA2              | GAPDH               |
| PKM                | HSPA8               |
| HSP90AA1           | ACTB                |
| ENO1               | CD9                 |
| YWHAZ              | PKM                 |
| YWHAE              | ENO1                |
| CLTC               | ANXA5               |
| ALDOA              | HSP90AB1            |
| ALB                | EEF1A1              |
| TPI1               | PGK1                |
| MYH9               | CLTC                |
| SLC3A2             | PPIA                |
| YWHAQ              | ALDOA               |
| ANXA1              | EEF2                |
| LDHA               | ALB                 |
| FASN               | TPI1                |
| CCT2               | VCP                 |
| YWHAG              | CFL1                |
| ACTN4              | MSN                 |
| HIST1H4A           | ATP1A1              |
| KRT1               | MYH9                |
| FN1                | SLC3A2              |
| AHCY               | PFN1                |
| ACTN1              | CLIC1               |
| ACLY               | ITGB1               |
| FLNA               | LDHA                |
| CCT4               | FASN                |
| LGALS3BP           | CCT2                |
| TUBB4B             | RAB5C               |
| KPNB1              | KRT1                |
| EIF4A1             | GDI2                |
| CCT8               | UBA1                |
| CCT6A              | CCT4                |
|                    | EIF4A1              |
|                    | CCT8                |
|                    | TLN1                |
|                    | CCT3                |
|                    | LGALS3BP            |
|                    | TCP1                |
|                    | CAP1                |
|                    | HSPA5               |

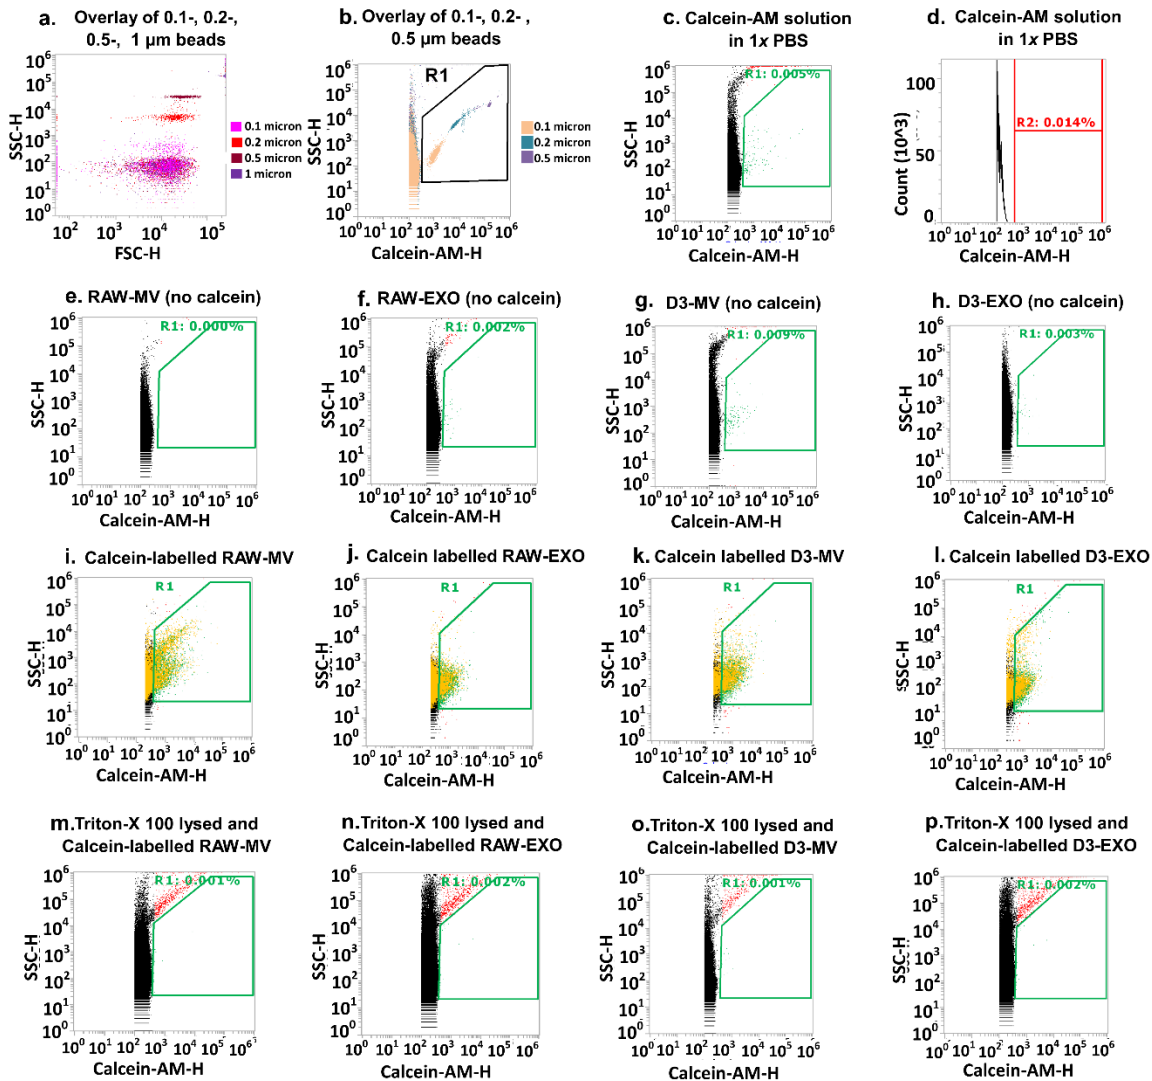

**Figure S1. Flow cytometry analysis of EVs.** (a) Side scatter (SSC)/Forward scatter (FSC) dot plots of 0.1, 0.2, and 0.5  $\mu\text{m}$  microbeads obtained from an Attune NxT Acoustic Focusing Cytometer. The EV gate was defined below 0.5  $\mu\text{m}$ , (b) SSC/Calcein-AM (BL1) fluorescent profiles of 0.1, 0.2, and 0.5  $\mu\text{m}$  microbeads used to set the EV gate and establish the measurement settings, (c) SSC/Calcein-AM scatter plots and (d) histogram of fluorescent signals demonstrating separation of the instrument noise and background signals for free calcein-AM solution in 1x PBS. EVs were isolated from hCMEC/D3 and RAW 264.7 cell lines and resuspended in 1x PBS. Non-stained RAW-MV (e), RAW-EXO (f), D3-MV (g) and D3-EXO (h) were used as negative controls to verify the absence of fluorescent signals in the gated area. Scatter plots of calcein-stained RAW-MV (i), RAW-EXO (j), D3-MV (k) and D3-EXO (l). Scatter plots of calcein-stained samples treated with Triton X (1 % v/v): (m) RAW-MV (n) RAW-EXO (o) D3-MV and (p) D3-EXO. The data shown are representative plots of n=3 samples.

**a. 24 h incubation**

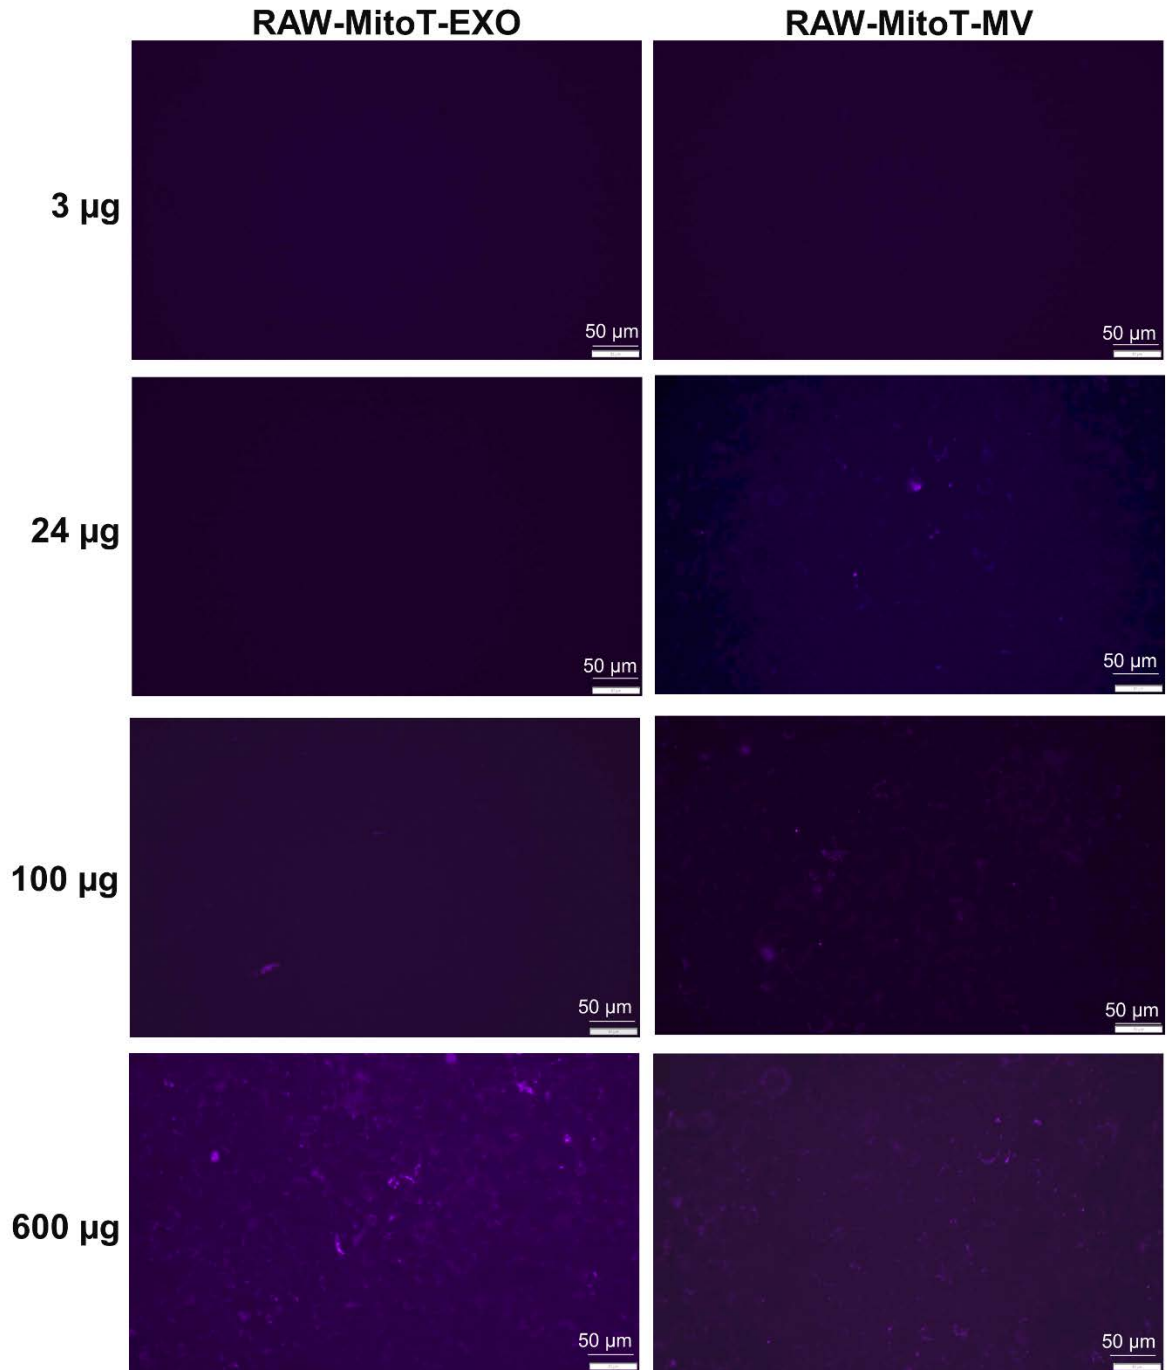

**b. 48 h incubation**

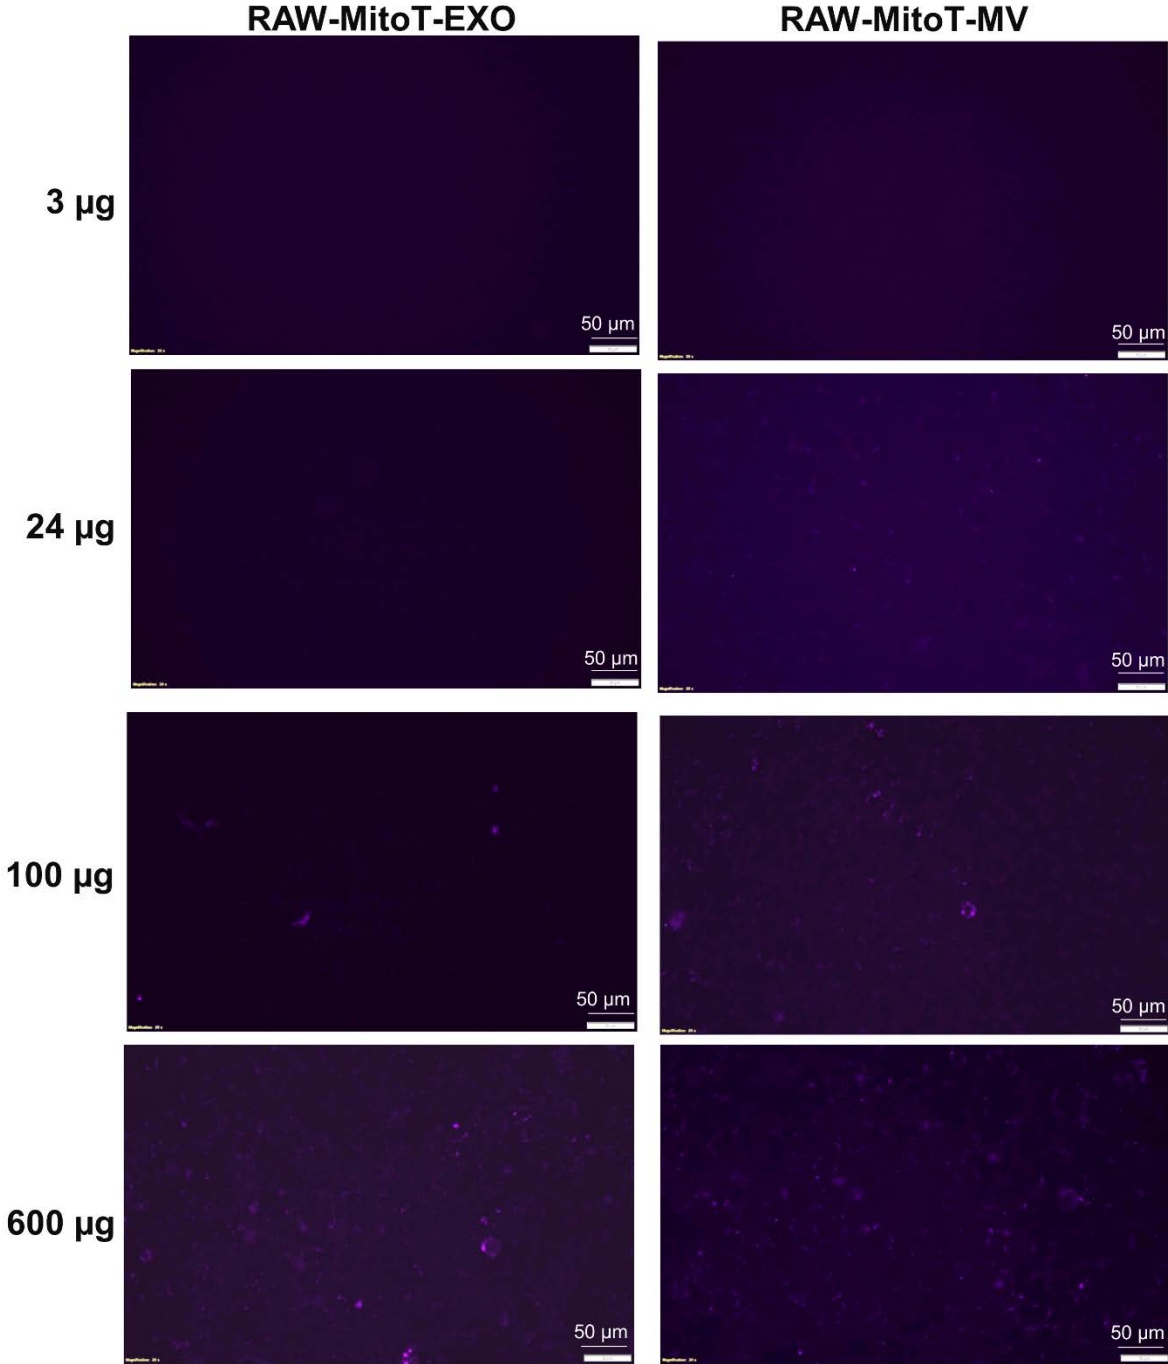

**c. 72 h incubation**

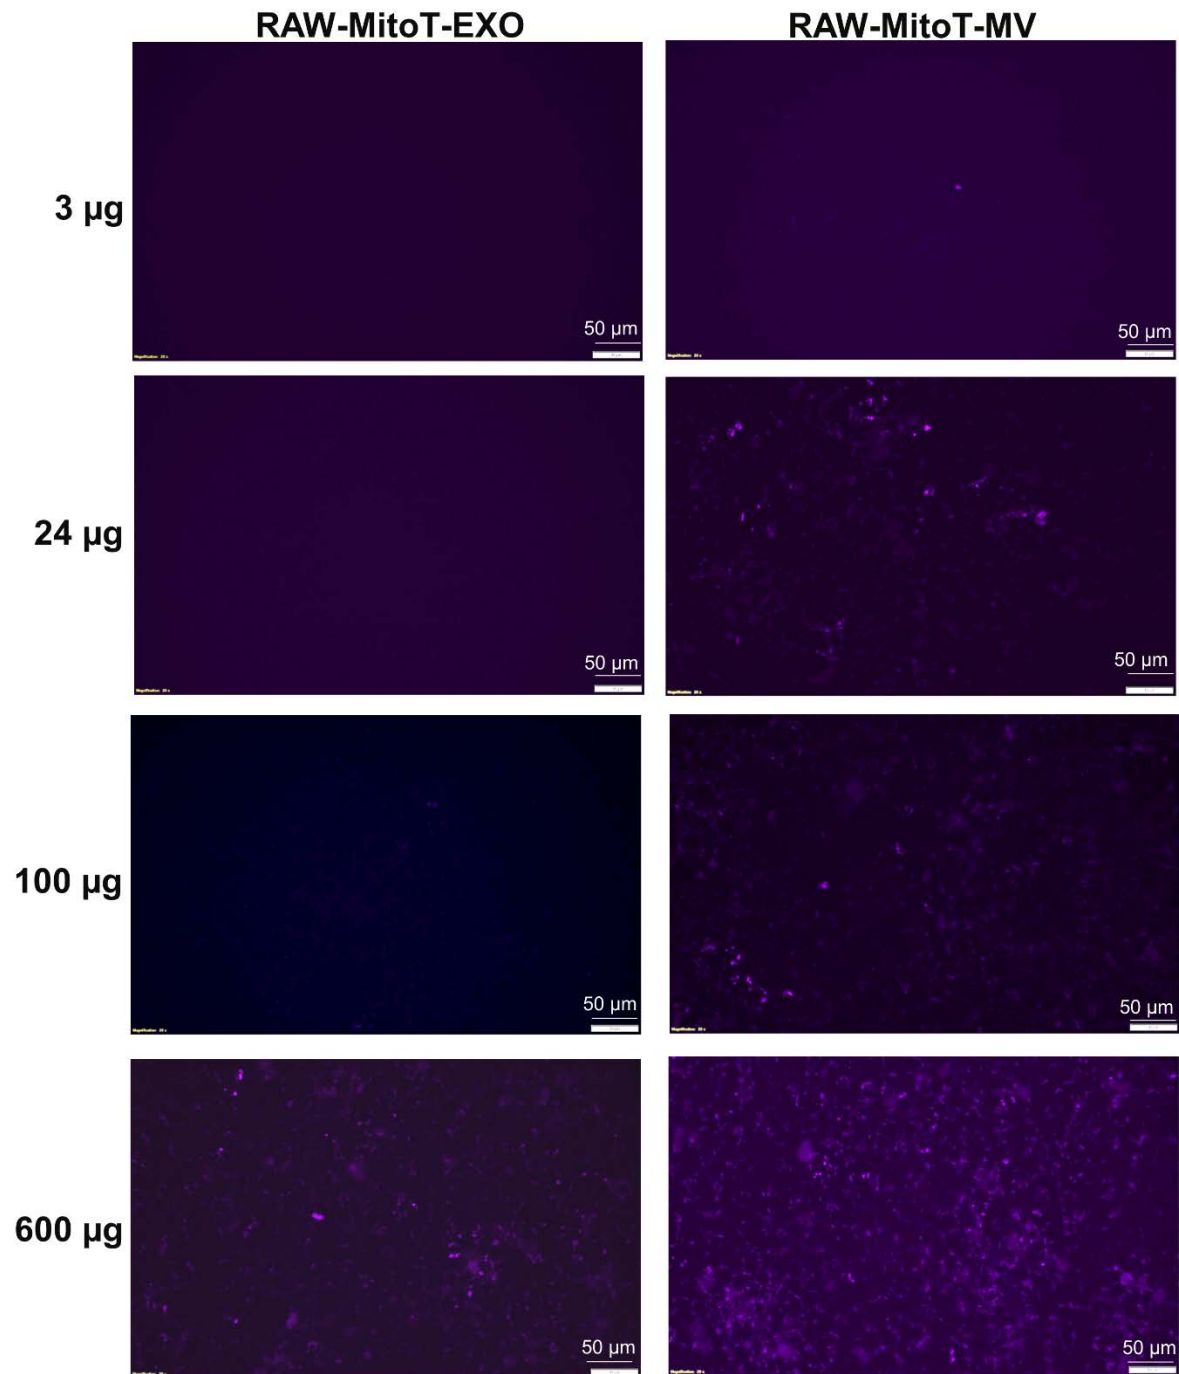

**Figure S2. Transfer of mitochondria from RAW-MitoT-EXO and RAW-MitoT-MV to the recipient hCMEC/D3 endothelial cells.** The donor/source RAW 264.7 macrophages were stained with MitoTracker Deep-Red (MitoT) (250 nM for 30 min) to specifically label polarized mitochondria following which the MitoT-EVs were isolated from conditioned media. The

recipient hCMEC/D3 endothelial cells were treated with RAW-MitoT-EXO and RAW-MitoT-MV at the indicated protein doses and observed under an Olympus IX 73 epifluorescent inverted microscope (Olympus, Pittsburgh, PA) under the Cy5 channel settings at 24 h, 48 h and 72 h post-treatment. The presented data are representative images from three independent experiments (n=3 per experiment). Scale bar = 50  $\mu$ m.

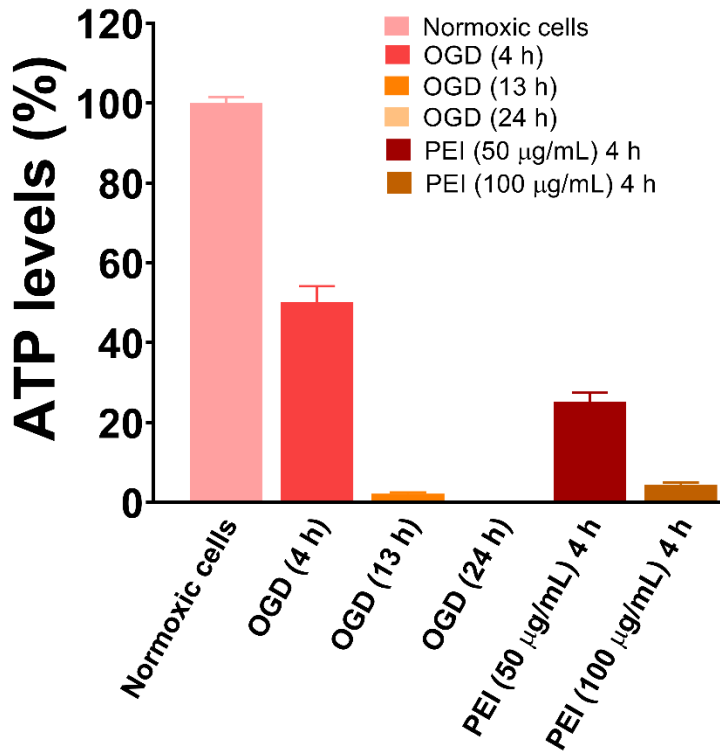

**Figure S3. Modelling oxygen-glucose deprivation (OGD)-induced cell death in hCMEC/D3 endothelial cells.** Confluent hCMEC/D3 endothelial cells seeded in a 96-well plate were subjected to OGD conditions for the indicated times. OGD was induced by exposing the cells in a sealed hypoxic (90% N<sub>2</sub>, 5% H<sub>2</sub>, 5% CO<sub>2</sub>) chamber and glucose-free media at 37 °C in a humidified incubator. An ATP assay was performed to measure the cell viability post-OGD exposure. The resulting ATP levels were compared to normoxic cells cultured in complete media. Normoxic cells treated with polyethyleneimine (PEI) for 4 h were used as a positive control. Data are represented as mean  $\pm$  SD (n = 6).
